# Supplementary material for: Highly sensitive and selective antibody microarrays based on a Cy5-antibody complexes coupling ES-biochip for E. coli and Salmonella detection
Source: Royal Society of Chemistry journal article supplement (doi:10.1039/d2ra03391g), 2022-01-01
Supplement: d2ra03391g1.pdf [file d2ra03391g1.pdf]

## Supplementary Information

### Highly sensitive and selective antibody microarrays based on Cy5-Antibody complexes coupling ES-biochip for *E. coli* and *Salmonella* detection

Timpika Homsombut<sup>a</sup>, Patsamon Rijiravanich<sup>b\*</sup>, Werusak Surareungchai<sup>a,c</sup>, Surachate Kalasin<sup>a\*\*</sup>

<sup>a</sup> Faculty of Science and Nanoscience & Nanotechnology Graduate Program, King Mongkut's University of Technology Thonburi, 10140, Thailand

<sup>b</sup> BioSciences and Systems Biology Research Team, National Center for Genetic Engineering and Biotechnology, National Sciences and Technology Development Agency at King Mongkut's University of Technology Thonburi, 10150, Thailand

<sup>c</sup> School of Bioresources and Technology, King Mongkut's University of Technology Thonburi, 10150, Thailand

\*Corresponding authors Email: \*patsamon.rij@biotec.or.th, \*\*surachate.kal@kmutt.ac.th

ORCID: 0000-0002-7080-9513 (Rijiravanich, P.)

ORCID: 0000-0001-6413-6642 (Kalasin, S.)

#### Content

1. Comparison of the fluorescent signal between Cy5-streptavidin and Cy5-Ab complexes.
2. Optimization conditions for preparation of Cy5-Ab complexes.
3. Optimization conditions for detection
4. Mono- and Duplex detection in buffer on ES-biochips.
5. Stability test for ES-biochip and Cy5-Ab complexes.
6. Evaluation of ES-biochip by food samples.
7. **Table. S1** Comparison of the overall analytical performance using antibody array for *E. coli* and *Salmonella* detection.
8. **Table. S2** The recovery of *E. coli* O157:H7 and *S. Typhimurium* detection in food samples testing.

## Comparison of the fluorescent signal between Cy5-streptavidin and Cy5-Ab complexes.

### Experiment

The flow chart below shows the step by step of measuring *E. coli* by using Cy5-streptavidin and Cy5-Ab complexes.

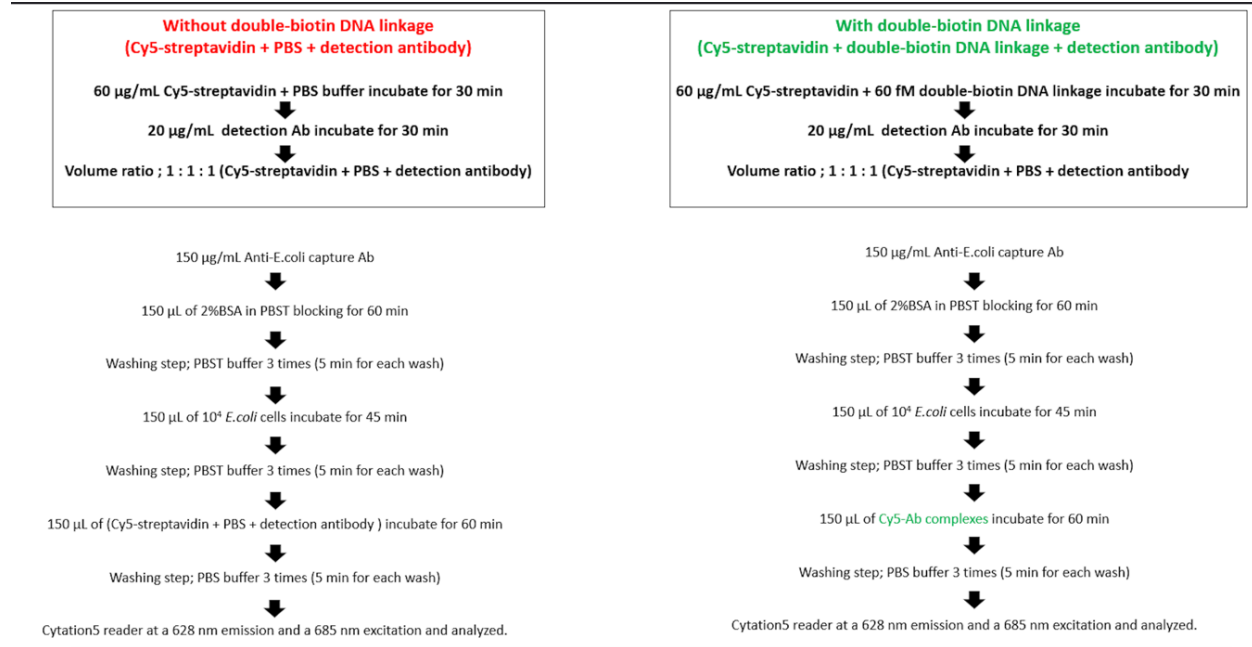

### Result

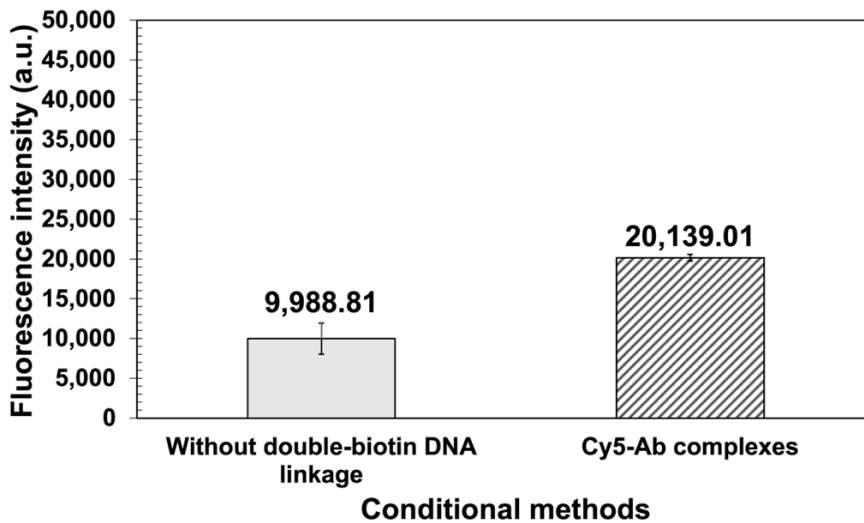

**Fig. S1** Comparison of the fluorescent signal between Cy5-streptavidin and Cy5-Ab complexes as label for detection of 10<sup>3</sup> CFU/mL of *E. coli* O157:H7 using simple array. Error bars show ±1 std. dev. ( $n = 9$ ).

## Optimization conditions for preparation of Cy5-Ab complexes

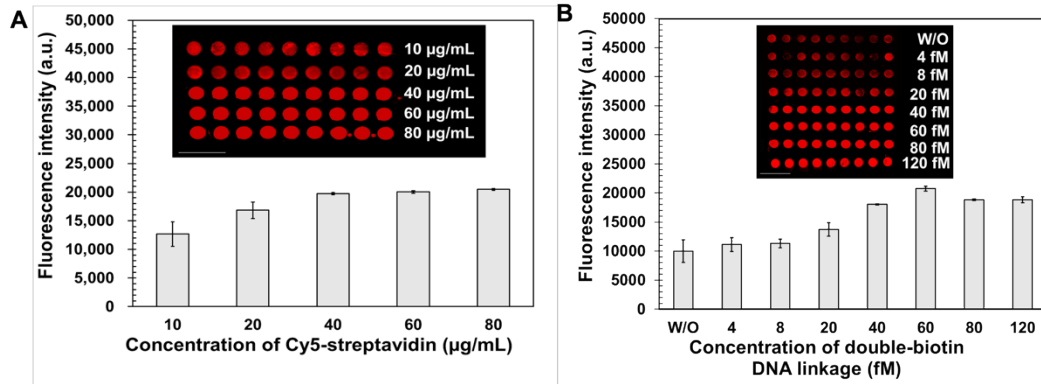

**Fig. S2 Optimization conditions for preparation of Cy5-Ab complexes.** Fluorescent intensities and images (inset) of  $10^4$  CFU/mL of *E. coli* O157:H7 using simple array at various concentrations of (A) Cy5-streptavidin and (B) double-biotin DNA linkage. Error bars show  $\pm 1$  std. dev. ( $n = 9$ ).

## Optimization conditions for detection

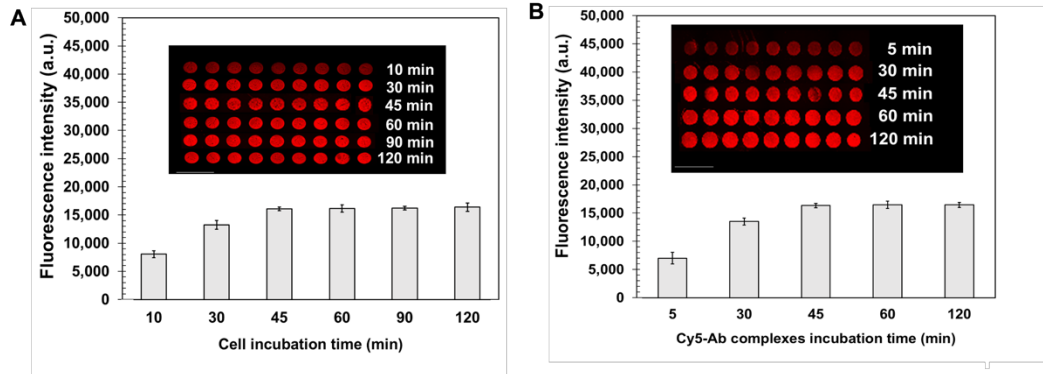

**Fig. S3 Optimization conditions for incubation time of (A) cell bacteria and (B) Cy5-Ab complexes on antibody array.** Fluorescent intensities and image (inset) of  $10^4$  CFU/mL of *E. coli* O157:H7 using simple array at various incubation time of (A) target bacteria and (B) Cy5-Ab complexes. Error bars show  $\pm 1$  std. dev. ( $n = 9$ ).

## Mono- and Duplex detection in buffer on ES-biochips

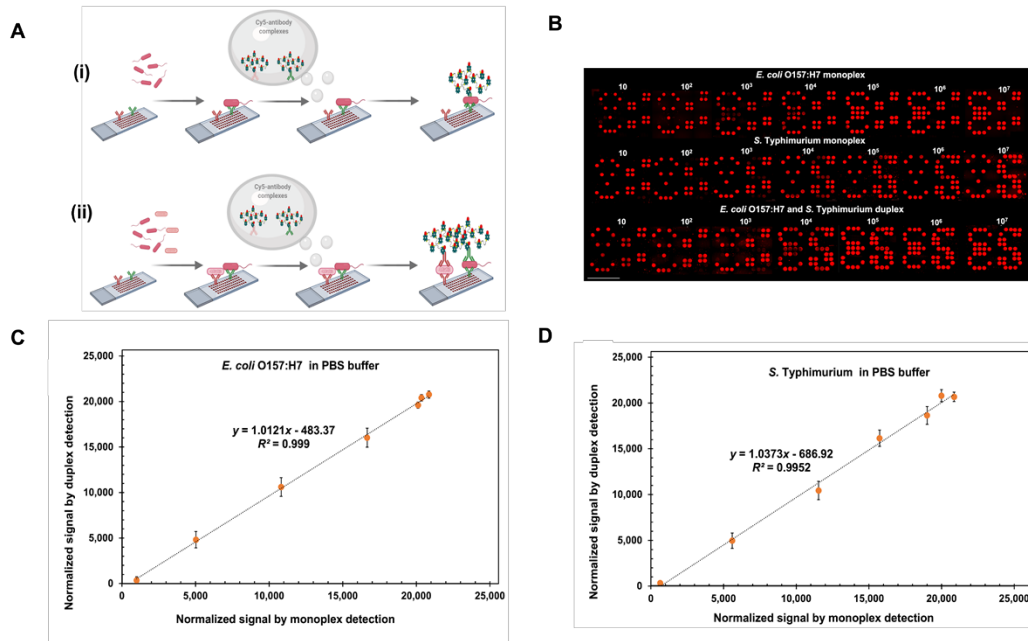

**Fig. S4 Mono- and Duplex detection in buffer on ES-biochips.** (A) Schematic detection of (i) monoplex and (ii) duplex using ES-biochip conjugated Cy5-Ab complexes label. (B) The fluorescence images for duplex detection of  $10^0$ - $10^7$  CFU/mL of *E. coli* O157:H7 and *S. Typhimurium*. Comparison between monoplex and duplex detection by (C) *E. coli* O157:H7 and (D) *S. Typhimurium* detection in PBS.

## Stability test for ES-biochip and Cy5-Ab complexes

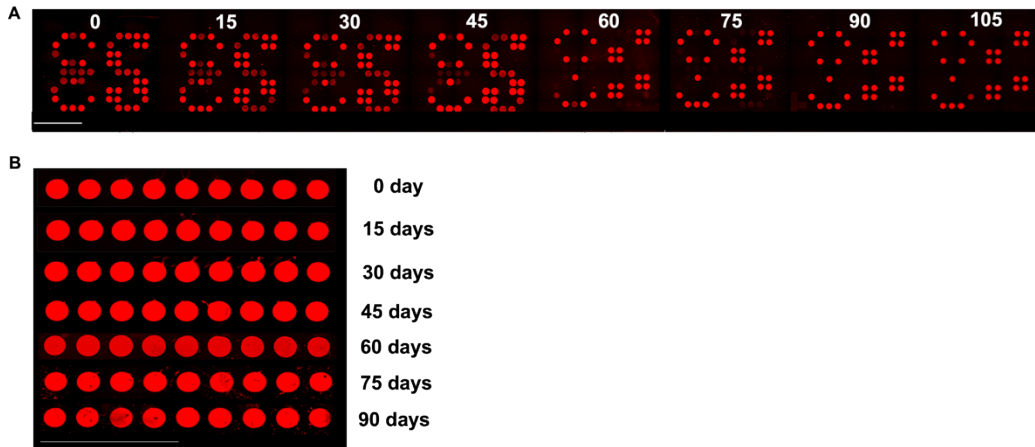

**Fig. S5 Stability test for (A) ES-biochip and (B) Cy5-Ab complexes.** Image of fluorescence intensities of (A) ES-biochip, stored at 4 °C, detected  $10^4$  CFU/mL of *E. coli* O157:H7 and *S. Typhimurium* with Cy5-Ab complexes as label. (B) Image of fluorescence intensities of  $10^4$  CFU/mL of *E. coli* O157:H7 using simple array with Cy5-Ab complexes stored at 4 °C.

## Evaluation of ES-biochip using food samples

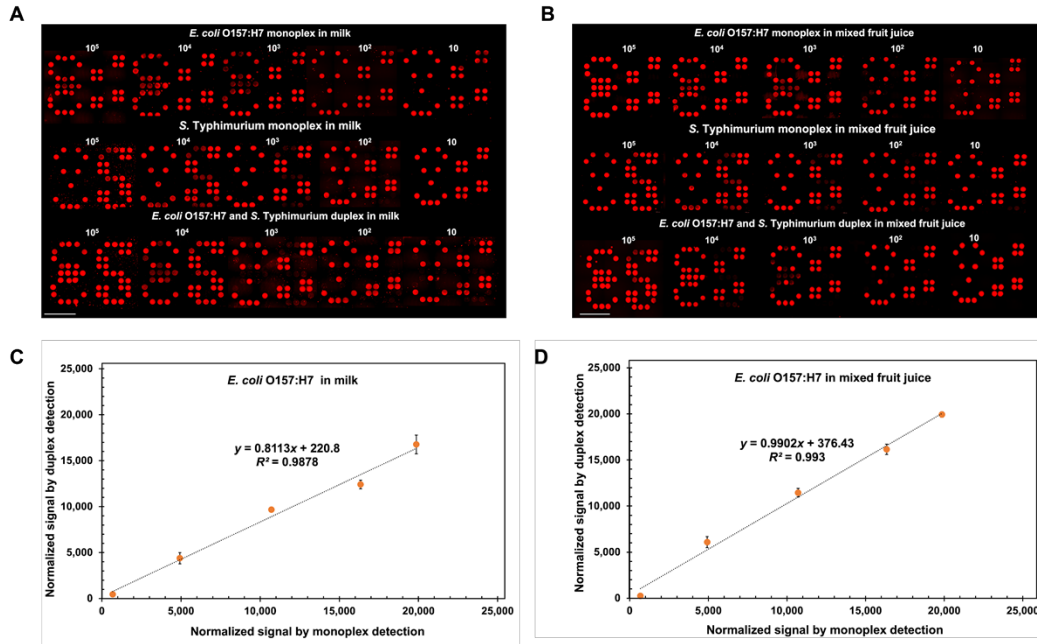

**Fig. S6 Real sample tests.** The fluorescence images for the duplex detection of different concentrations of spiked *E. coli* O157:H7 and *S. Typhimurium* ranging from 10 to  $10^5$  CFU/mL in (A) commercial milk and (B) mixed fruit juice using the ES-biochips. Comparison signals of *E. coli* O157:H7 detection in (C) PBS and milk and (D) PBS and juice.

**Table. S1** Comparison of the overall analytical performance using antibody array for *E. coli* and *Salmonella* detection.

| Pathogens                                                                   | Label                        | Detection limit (CFU/mL)                              | Detection range                                                                                       | Assay time (h) | Samples                   | Ref.      |
|-----------------------------------------------------------------------------|------------------------------|-------------------------------------------------------|-------------------------------------------------------------------------------------------------------|----------------|---------------------------|-----------|
| <i>E. coli</i> O157:H7<br><i>Salmonella</i> spp.                            | Horseradish peroxidase (HRP) | $8 \times 10^4$<br>$5 \times 10^7$                    | $2 \times 10^4 - 5 \times 10^7$<br>$1 \times 10^6 - 1 \times 10^9$                                    | 1.15           | Milk                      | 1         |
| <i>E. coli</i> O157:H7<br><i>Salmonella</i> spp.                            | Cy3                          | $1 \times 10^6$<br>$1 \times 10^7$                    | $1 \times 10^6 - 1 \times 10^9$<br>$1 \times 10^7 - 1 \times 10^9$                                    | 2.5            | -                         | 2         |
| <i>E. coli</i> O157:H7<br><i>Salmonella</i> spp.                            | Horseradish peroxidase (HRP) | $1.5 \times 10^6$<br>$1.3 \times 10^7$                | $1 \times 10^5 - 1 \times 10^6$<br>$1 \times 10^6 - 1 \times 10^7$                                    | 1              | Milk                      | 3         |
| <i>Salmonella</i> spp.                                                      | Label-free                   | $7.6 \times 10^6$                                     | $5.14 \times 10^4 - 5.14 \times 10^8$                                                                 | 1.30           | Chicken rinse matrix      | 4         |
| <i>E. coli</i> O157:H7<br>Shiga toxin 1 (Stx1)                              | Alexa Fluor 555              | $5.8 \times 10^5$<br>110 ng/mL                        | $6.4 \times 10^4 - 1.4 \times 10^8$<br>$1.4 \times 10^0 - 9 \times 10^3$ ng/mL                        | 1.15           | -                         | 5         |
| <i>E. coli</i> O157:H7<br><i>Salmonella</i> spp.<br><i>L. monocytogenes</i> | Alexa-Fluor 647              | $1 \times 10^3$<br>$1 \times 10^3$<br>$1 \times 10^3$ | $1 \times 10^1 - 1 \times 10^9$<br>$1 \times 10^1 - 1 \times 10^9$<br>$1 \times 10^1 - 1 \times 10^9$ | 2              | Beef, chicken, and turkey | 6         |
| <i>E. coli</i> O157:H7<br><i>S. Typhimurium</i>                             | Cy5-Ab complexes             | 8.4<br>7.2                                            | $1 \times 10^1 - 1 \times 10^5$                                                                       | 1.45           | Milk                      | This work |
| <i>E. coli</i> O157:H7<br><i>S. Typhimurium</i>                             | (Signal amplification)       | 7.2<br>8.5                                            |                                                                                                       |                | Mixed fruit juice         |           |



**Table. S2** The recovery of *E. coli* O157:H7 and *S. Typhimurium* detection in food samples testing.

| <b>Samples</b>           | <b>Pathogens</b>       | <b>Spiked concentration<br/>(CFU/mL)</b> | <b>Detected concentration<br/>(CFU/mL)</b> | <b>Recovery (%)</b> |
|--------------------------|------------------------|------------------------------------------|--------------------------------------------|---------------------|
| <b>Milk</b>              | <i>E. coli</i> O157:H7 | 1                                        | 0.96                                       | 98.4                |
|                          |                        | 5                                        | 4.259                                      | 85.2                |
|                          | <i>S. Typhimurium</i>  | 1                                        | 0.89                                       | 89.02               |
|                          |                        | 5                                        | 4.81                                       | 96.3                |
| <b>Mixed fruit juice</b> | <i>E. coli</i> O157:H7 | 1                                        | 0.94                                       | 94.04               |
|                          |                        | 5                                        | 4.89                                       | 97.9                |
|                          | <i>S. Typhimurium</i>  | 1                                        | 0.99                                       | 98.7                |
|                          |                        | 5                                        | 4.92                                       | 98.5                |

## Supplementary References

1. R. Charlermroj, O. Gajanandana, C. Barnett, K. Kirtikara and N. Karoonuthaisiri, *Anal. Lett.*, 2011, **44**, 1085-1099, DOI: 10.1080/00032719.2010.511736.
2. A. G. Gehring, D. M. Albin, S. A. Reed, S.I. Tu and J. D. Brewster, *Anal. Bioanal. Chem*, 2008, **391**, 497-506, DOI: 10.1007/s00216-008-2044-6.
3. N. Karoonuthaisiri, R. Charlermroj, U. Uawisetwathana, P. Luxananil, K. Kirtikara and O. Gajanandana, *Biosens. Bioelectron*, 2009, **24**, 1641-1648, DOI: 10.1016/j.bios.2008.08.026.
4. J. Chen and B. Park, *Anal Bioanal Chem*, 2018, **410**, 5455-5464, DOI: 10.1007/s00216-017-0810-z.
5. A. G. Gehring, J. D. Brewster, Y. He, P. L. Irwin, G. C. Paoli, T. Simons, S.I. Tu and J. Uknalis, *Sensors*, 2015, **15**, 30429-30442, DOI: 10.3390/s151229807.
6. S.H. Ohk and A. K. Bhunia, *Food Microbiology*, 2013, **33**, 166-171, DOI: 10.1016/j.fm.2012.09.013.
